# Supplementary material for: Sensor-Based Irrigation Reduces Water Consumption without Compromising Yield and Postharvest Quality of Soilless Green Bean
Source: MDPI journal article supplement (doi:10.3390/agronomy11122485), 2021-12-07
Supplement: s1 [file s1]

**Table S1.** Leaf net CO<sub>2</sub> assimilation rate (An), stomatal conductance to water vapour (gsw), concentration of internal CO<sub>2</sub> (Ci), transpiration (E), instantaneous water use efficiency (WUEi) and leaf chlorophyll content (chl) of green bean plants irrigated with a timer or based on dielectric sensors at 0.35, 0.30 and 0.25 m<sup>3</sup> m<sup>-3</sup> irrigation set-point.

|                     | An                                                   | gsw                                                  | Ci                                         | E                                                     | WUEi                                                     | chl                  |
|---------------------|------------------------------------------------------|------------------------------------------------------|--------------------------------------------|-------------------------------------------------------|----------------------------------------------------------|----------------------|
|                     | μmol CO <sub>2</sub> m <sup>-2</sup> s <sup>-1</sup> | mol H <sub>2</sub> O m <sup>-2</sup> s <sup>-1</sup> | μmol CO <sub>2</sub> mol air <sup>-1</sup> | mmol H <sub>2</sub> O m <sup>-2</sup> s <sup>-1</sup> | μmol CO <sub>2</sub> mmol H <sub>2</sub> O <sup>-1</sup> | μmol m <sup>-2</sup> |
| <b>TIMER</b>        | 17.3                                                 | 0.4                                                  | 288                                        | 8.2                                                   | 2.1                                                      | 361                  |
| <b>SENSOR_0.35</b>  | 16.5                                                 | 0.3                                                  | 279                                        | 7.8                                                   | 2.1                                                      | 366                  |
| <b>SENSOR_0.30</b>  | 16.9                                                 | 0.4                                                  | 286                                        | 8.0                                                   | 2.1                                                      | 380                  |
| <b>SENSOR_0.25</b>  | 16.6                                                 | 0.4                                                  | 293                                        | 8.2                                                   | 2.0                                                      | 417                  |
| <b>Significance</b> | ns                                                   | ns                                                   | ns                                         | ns                                                    | ns                                                       | ns                   |

Mean separation within columns by LSD test. ns: not significant at P≤0.05.

**Table S2.** Nitrogen, calcium, potassium and magnesium content in shoot, roots and fruits; carotenoids, glucose (Glu) and fructose (Fru) content in fruits of green bean plants irrigated with a timer or based on dielectric sensors at 0.35, 0.30 and 0.25 m<sup>3</sup> m<sup>-3</sup> irrigation set-point.

|                     | Shoot                    |      |      |     | Roots |      |      |     | Fruits |     |      |     |                       |                       |      |
|---------------------|--------------------------|------|------|-----|-------|------|------|-----|--------|-----|------|-----|-----------------------|-----------------------|------|
|                     | N tot                    | Ca   | K    | Mg  | N tot | Ca   | K    | Mg  | N tot  | Ca  | K    | Mg  | Carotenoids           | Glu                   | Fru  |
|                     | g kg <sup>-1</sup> of DW |      |      |     |       |      |      |     |        |     |      |     | mg g <sup>-1</sup> DW | g kg <sup>-1</sup> FW |      |
| <b>TIMER</b>        | 24.9                     | 34.9 | 23.9 | 4.4 | 24.6  | 14.8 | 18.2 | 5.9 | 32.0   | 8.1 | 29.2 | 2.5 | 276                   | 12.2                  | 17.1 |
| <b>SENSOR_0.35</b>  | 23.2                     | 28.7 | 24.3 | 3.1 | 19.6  | 22.7 | 28.1 | 5.6 | 31.5   | 7.3 | 30.0 | 2.5 | 292                   | 13.2                  | 20.3 |
| <b>SENSOR_0.30</b>  | 26.5                     | 27.3 | 30.6 | 3.3 | 23.5  | 15.4 | 18.7 | 5.0 | 32.8   | 8.1 | 31.3 | 2.6 | 309                   | 13.0                  | 21.0 |
| <b>SENSOR_0.25</b>  | 20.4                     | 31.8 | 20.9 | 3.2 | 24.6  | 19.0 | 17.1 | 5.4 | 30.3   | 6.7 | 32.3 | 2.7 | 314                   | 12.1                  | 17.2 |
| <b>Significance</b> | ns                       | ns   | ns   | ns  | ns    | ns   | ns   | ns  | ns     | ns  | ns   | ns  | ns                    | ns                    | ns   |

Mean separation within columns by LSD test. ns not significant at P≤0.05.
